# Supplementary material for: Neurodevelopmental outcome at 5.5 years in Dutch preterm infants born at 24–26 weeks’ gestational age: the EPI-DAF study
Source: PubMed Central journal article supplement — Arch Dis Child Fetal Neonatal Ed. 2024 Apr 18;109(3):272–8. doi: 10.1136/archdischild-2023-325732 (PMC11041588; doi:10.1136/archdischild-2023-325732), 2024-04-18

**Online supplemental 1 – Legend . Flowchart**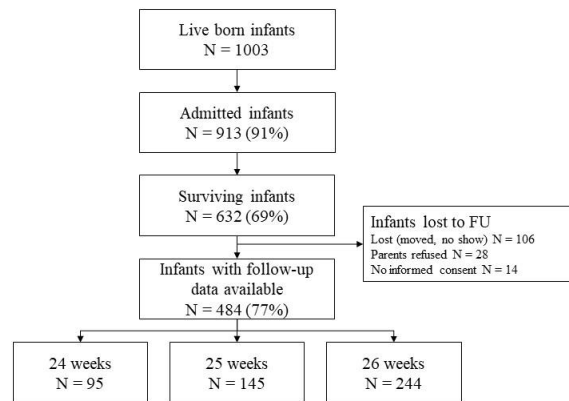

**Online supplement 2. Baseline characteristics of all NICU-survivors born <27 weeks' gestational age (GA) who reached 5 years' CA in 2018-2020, separately for infants with and without follow-up data available.**

| Follow-up data available           | Yes<br>N = 484 | No<br>N = 148 | p-value |
|------------------------------------|----------------|---------------|---------|
| Birth weight (g)                   | 818 (159)      | 826 (146)     | 0.552   |
| Sex (male)                         | 266 (55.0)     | 74 (50.0)     | 0.335   |
| SGA (<10 <sup>th</sup> percentile) | 95 (19.6)      | 29 (19.6)     | 1.000   |
| Caesarean section                  | 201 (41.5)     | 71 (48.0)     | 0.197   |
| Multiple birth                     | 161 (33.3)     | 41 (27.7)     | 0.242   |
| 5-minute Apgar                     | 7 [6, 8]       | 7 [6, 8]      | 0.126   |
| Severe NEC or SIP                  | 46 (9.5)       | 16 (10.8)     | 0.757   |
| Severe brain injury                | 81 (16.7)      | 18 (12.2)     | 0.226   |
| Socio-economic status              |                |               | 0.028*  |
| <i>Low</i>                         | 128 (26.9)     | 55 (38.5)     |         |
| <i>Intermediate</i>                | 286 (60.1)     | 71 (49.7)     |         |
| <i>High</i>                        | 62 (13.0)      | 17 (11.9)     |         |

Birth weight is presented as mean (SD), Apgar score is presented as median [Q1,Q3], other variables are presented as N (%). Small for gestational age (SGA) was defined as birth weight below 10<sup>th</sup> percentile. # Socio-economic status was calculated based on postal code at birth, and thus available for all born infants. Therefore, it was possible to use this measure for imputation of long-term outcome in all NICU-survivors including those lost to follow-up. Information on maternal education was not available for the full group of infants, as maternal education was collected during follow-up. Gestational age (GA); corrected age (CA); necrotizing enterocolitis (NEC). A p-value below 0.05 (marked with a \*) is considered significant.

**Online supplement 3 – Legend. Graphical presentation of outcomes among extremely preterm born children at 5.5 years of age**

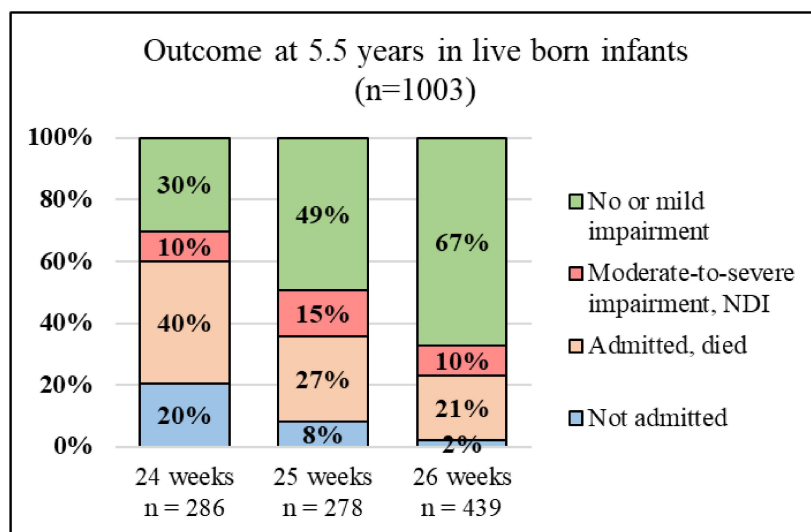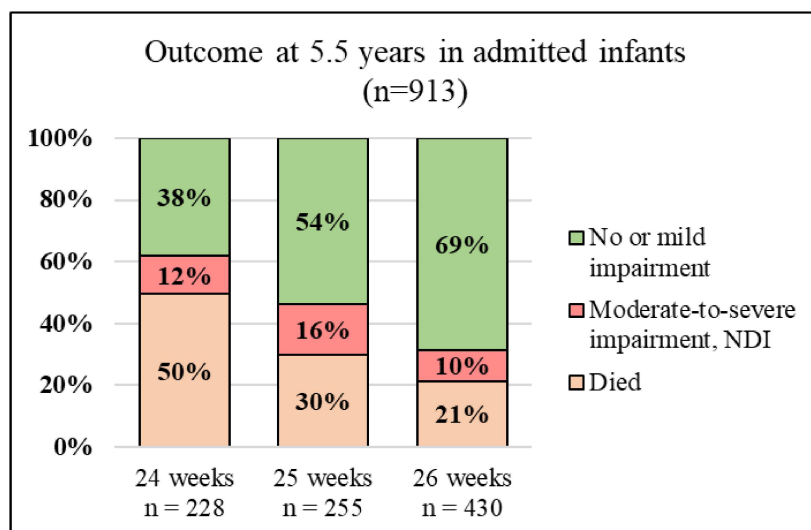

Supplement: fetalneonatal-2023-325732supp001.pdf [file fetalneonatal-2023-325732supp001.pdf]
